# Supplementary material for: On Catalysis by Biological Macromolecular Enzymes
Source: Preprints.org preprint supplement (doi:10.20944/preprints202008.0607.v2), 2020-11-16
Supplement: Supplementary file 1 [file supplementary]

**Fig.S1**. The shape of Michaelis-Menten equation V0=Vmax[S]/(Km+[S]), the relationship between the initial velocity V0(as Y axis) and the substrate concentration [S] (as X axis) of many enzyme catalyzed reactions show this phenomenon, the function can be changed to the form of 1/y=(a/x) +b.
